# Supplementary material for: Kinetic Analysis of Dynamic 11C-Acetate PET/CT Imaging as a Potential Method for Differentiation of Hepatocellular Carcinoma and Benign Liver Lesions
Source: PubMed Central journal article supplement — Theranostics. 2015 Jan 21;5(4):371–7. doi: 10.7150/thno.10760 (PMC4329501; doi:10.7150/thno.10760), 2015-01-21
Supplement: thnov05p0371s1.pdf [file thnov05p0371s1.pdf]

## Supplemental figures

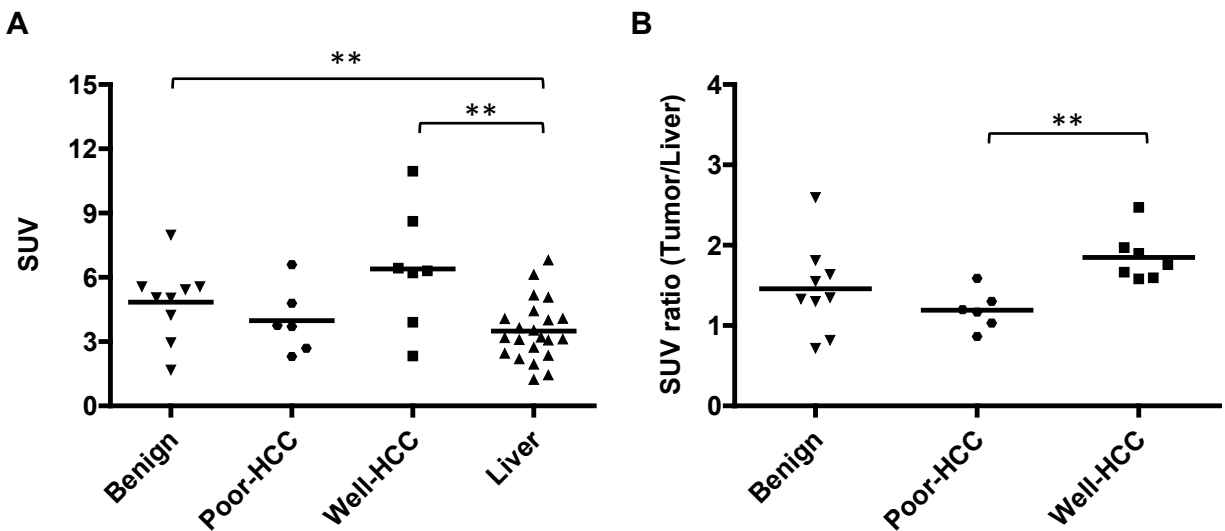

**Figure S1.** Comparison of SUV (A) and lesion to non-lesion liver tissue SUV ratio (B) for benign lesion, poorly-differentiated HCC, well-differentiated HCC and non-tumor liver tissue. Unpaired student t test was performed to evaluate the differences between each two groups. \*\*,  $P < 0.01$ .

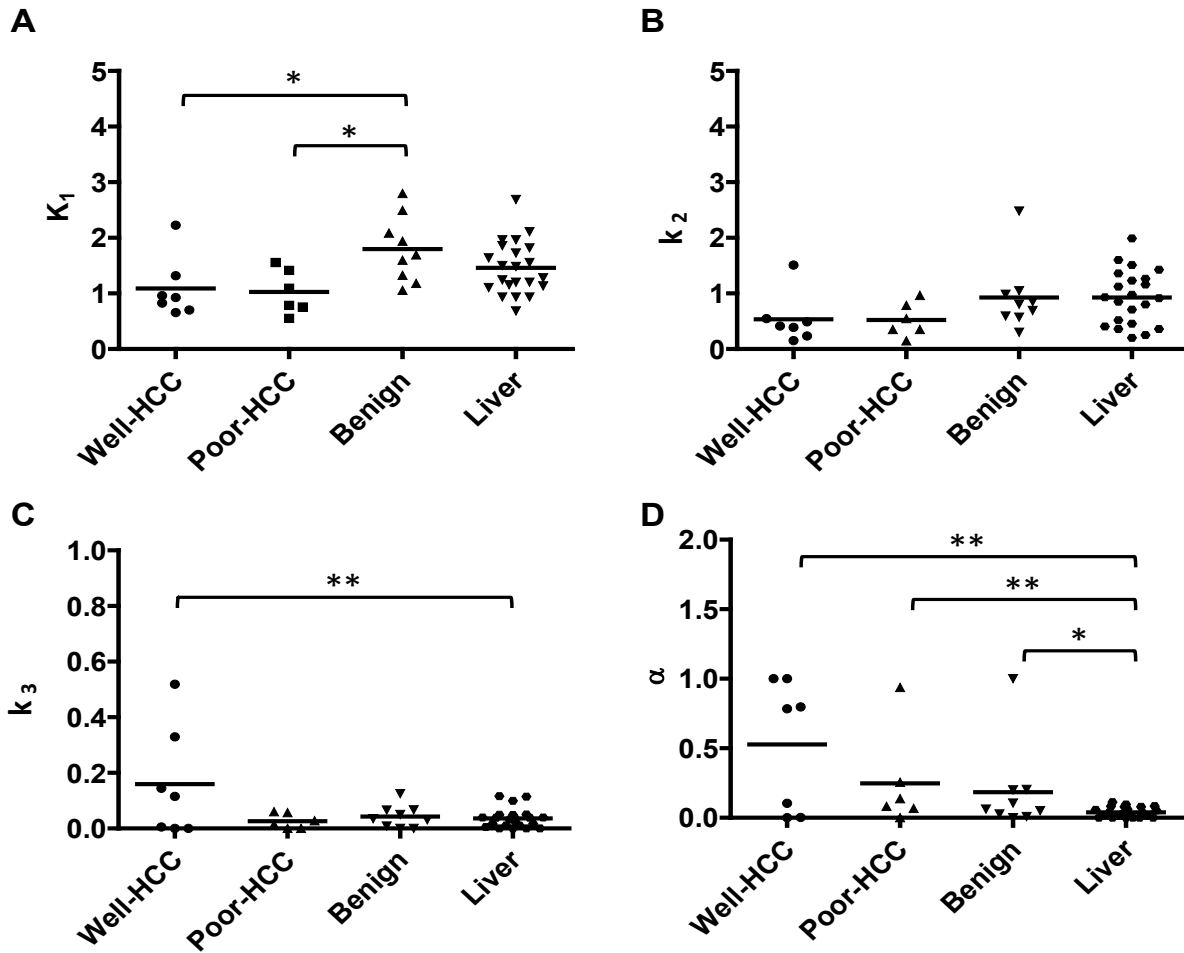

**Figure S2.** Comparison of  $K_1$  (A),  $k_2$  (B),  $k_3$  (C) and  $\alpha$  (D) for benign lesion, poorly-differentiated HCC, well-differentiated HCC and non-lesion liver tissue. Unpaired student t-test was performed to evaluate the differences between each two groups. \*,  $P < 0.05$ ; \*\*,  $P < 0.01$ .

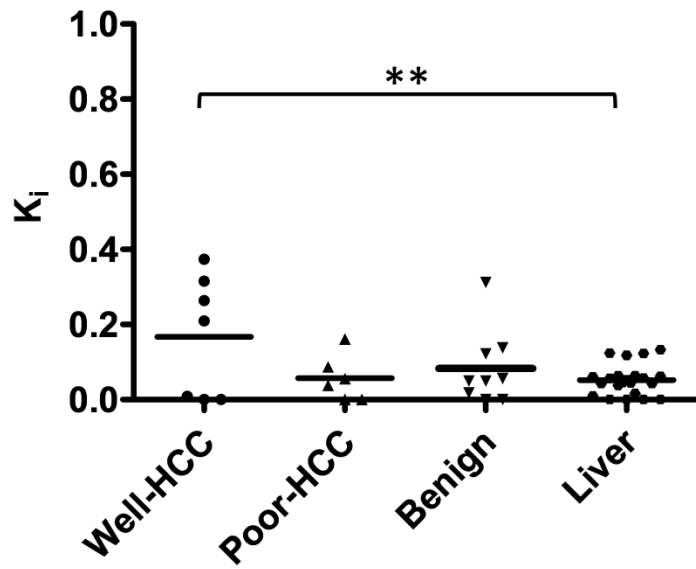

**Figure S3.** Comparison of the local hepatic  $^{11}\text{C}$ -Acetate metabolic rate  $K_i$  for well-differentiated HCC, poorly-differentiated HCC, benign lesions and non-lesion liver tissues. Unpaired student t-test was performed to evaluate the differences between each two groups. \*\*,  $P < 0.01$ .

Table S1. The differentiation results with discriminant analysis for all the lesions

| Group       | I* |   |   |   |   |     |   | II  |    |    |    |    |     | III |     |     |     |     |     |     |     |    |    |
|-------------|----|---|---|---|---|-----|---|-----|----|----|----|----|-----|-----|-----|-----|-----|-----|-----|-----|-----|----|----|
|             | 1  | 2 | 3 | 4 | 5 | 6   | 7 | 8   | 9  | 10 | 11 | 12 | 13  | 14  | 15  | 16  | 17  | 18  | 19  | 20  | 21  | 22 |    |
| Patient No. | 1  | 2 | 3 | 4 | 5 | 6   | 7 | 8   | 9  | 10 | 11 | 12 | 13  | 14  | 15  | 16  | 17  | 18  | 19  | 20  | 21  | 22 |    |
| Prediction  | I  | I | I | I | I | III | I | III | II | I  | II | II | III | I   | III | II | II |
| Validation  | I  | I | I | I | I | III | I | III | II | I  | II | II | III | I   | III | III | III | III | I   | III | II  | II |    |

\*I, Well differentiated HCC; II, Poorly-differentiated HCC; III, Benign tumor.
